# Supplementary material for: A 2D layered cobalt-based metal–organic framework for photoreduction of CO2to syngas with a controllable wide ratio range
Source: Royal Society of Chemistry journal article supplement (doi:10.1039/d2ta08092c), 2022-11-29
Supplement: d2ta08092c1.pdf [file d2ta08092c1.pdf]

## Supporting Information

### A 2D Layered Cobalt-Based Metal-Organic Framework for Photoreduction of CO<sub>2</sub> to Syngas with a Controllable Wide Ratio

**Mei-Juan Wei,<sup>a#</sup> Xian-Yan Xu,<sup>b#,\*</sup> Jia-Qi Song,<sup>a#</sup> Mei Pan,<sup>a,\*</sup> and Cheng-Yong Su<sup>a,\*</sup>**

<sup>a</sup>MOE Laboratory of Bioinorganic and Synthetic Chemistry, Lehn Institute of Functional Materials, School of Chemistry, Sun Yat-Sen University, Guangzhou 510006, China. Email: panm@mail.sysu.edu.cn, cessey@mail.sysu.edu.cn

<sup>b</sup>College of Chemistry and Civil Engineering, Shaoguan University, Shaoguan 512005, China. Email: sofiaxy@sgu.edu.cn

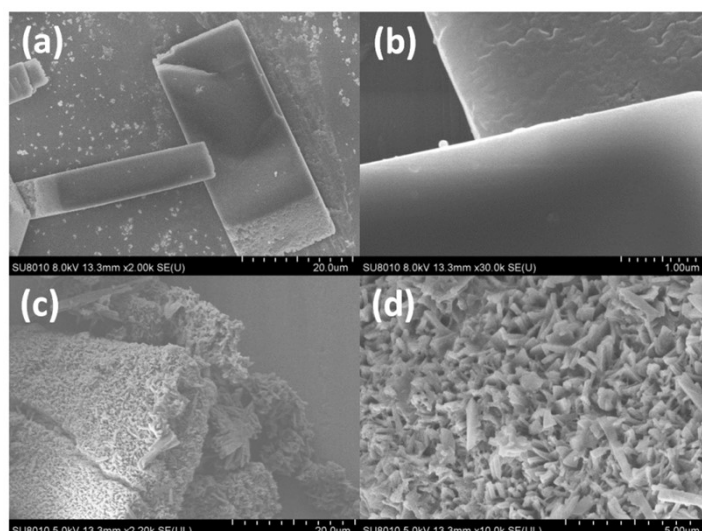

**Figure S1.** SEM images of Co-TBAPy before photocatalytic CO<sub>2</sub> reduction (a), (b); and after photocatalysis (c), (d).

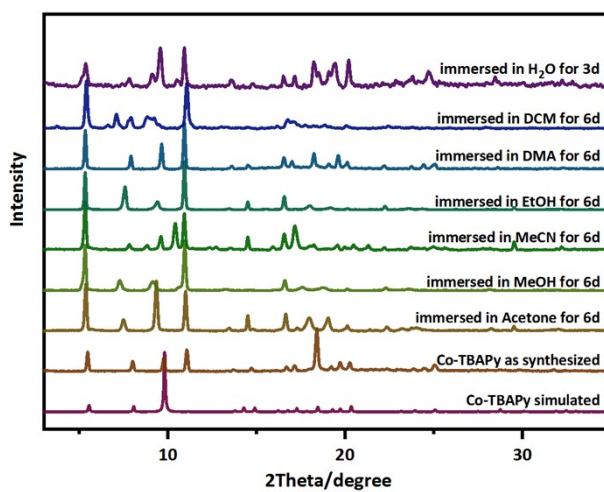

**Figure S2.** PXRD patterns of Co-TBAPy soaked in different solvents for a period of time.

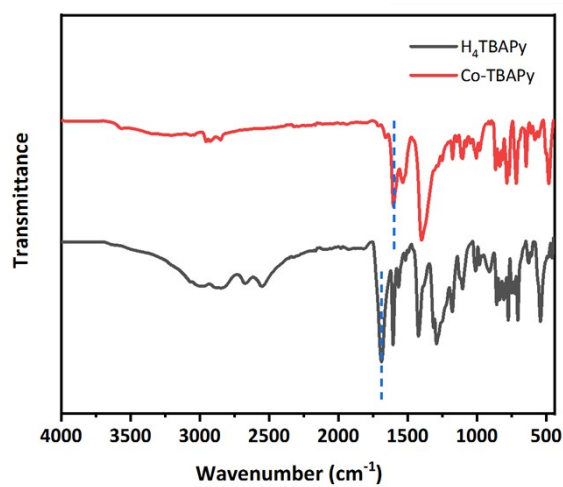

**Figure S3.** FT-IR spectrums of Co-TBAPy and H<sub>4</sub>TBAPy.

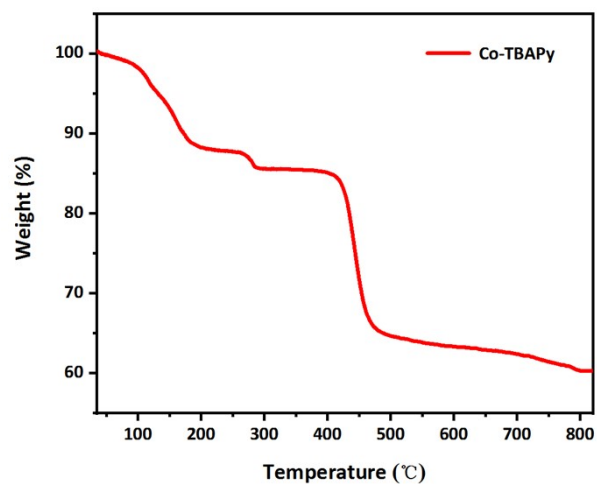

Figure S4. Thermogravimetric (TG) curve of Co-TBAPy.

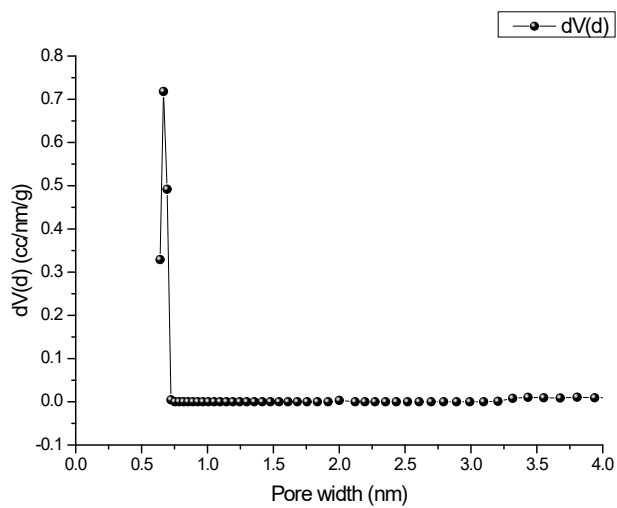

Figure S5. Pore size distribution curve of Co-TBAPy.

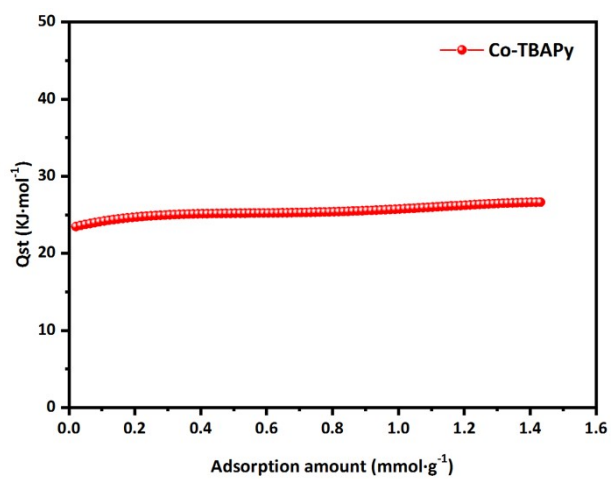

Figure S6. Adsorption enthalpy for carbon dioxide of Co-TBAPy.

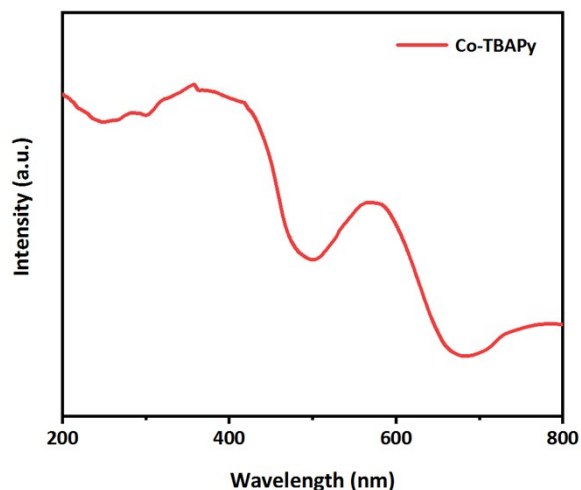

**Figure S7.** Ultraviolet-visible absorption (UV-Vis) spectrum of Co-TBAPy.

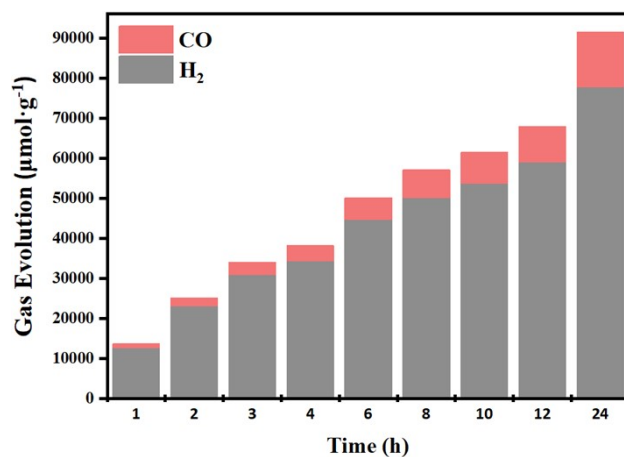

**Figure S8.** The H<sub>2</sub>/CO ratio under the CO<sub>2</sub>-saturated MeCN solution (5 mL) containing Co-TBAPy (5  $\mu\text{mol}$ ), [Ru(bpy)<sub>3</sub>]Cl<sub>2</sub> (0.01 mmol), TEOA (1 mL) and H<sub>2</sub>O (0.25 mL) at room temperature and irradiated by  $\lambda > 420$  nm.

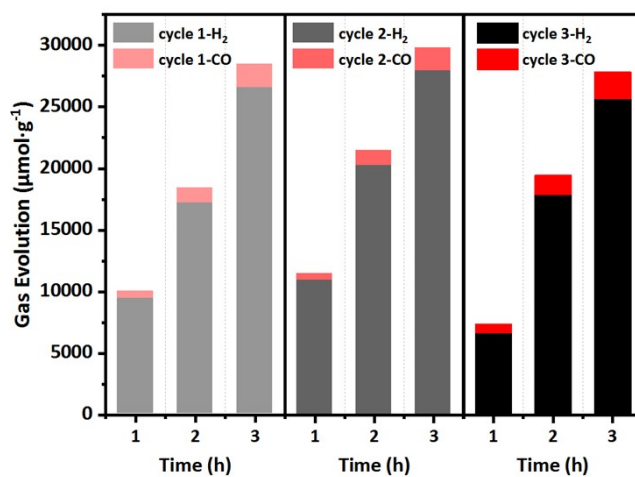

**Figure S9.** Amounts of CO and H<sub>2</sub> during three-run recycling experiments.

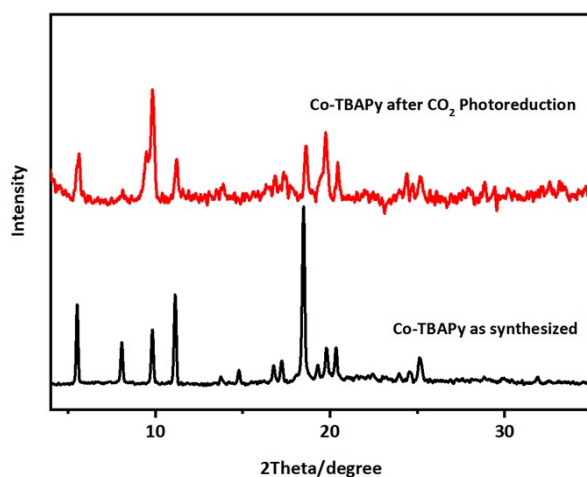

**Figure S10.** PXRD spectra of Co-TBAPy after photocatalytic CO<sub>2</sub> reduction compared with the as synthesized one.

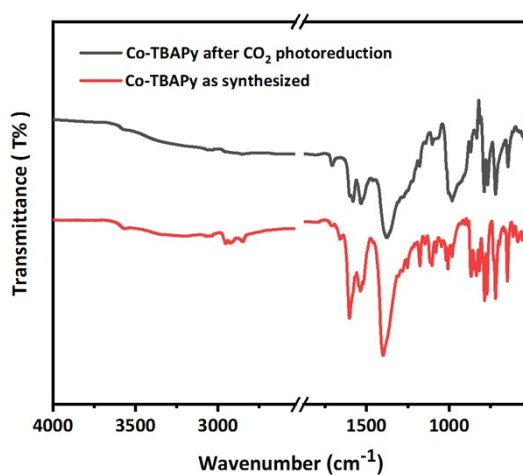

**Figure S11.** FT-IR spectra of Co-TBAPy after photocatalytic CO<sub>2</sub> reduction compared with the as synthesized one.

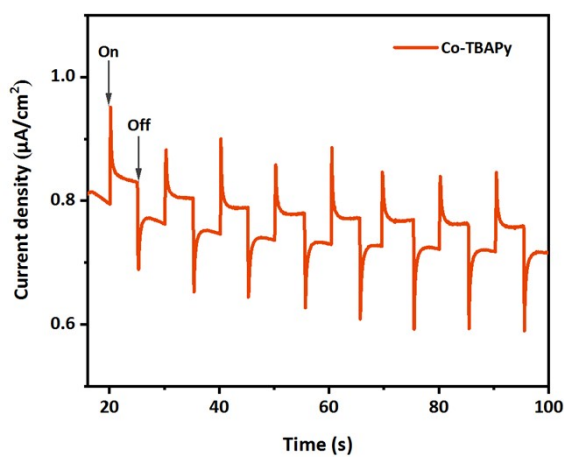

**Figure S12.** Photocurrent response curves of Co-TBAPy.

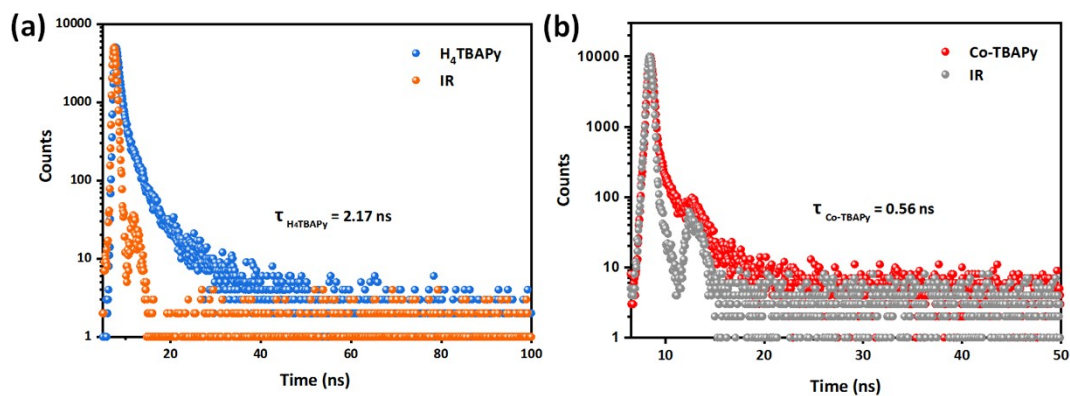

**Figure S13.** Time-resolved transient PL decay spectra of H<sub>4</sub>TBAPy (a) and Co-TBAPy (b).

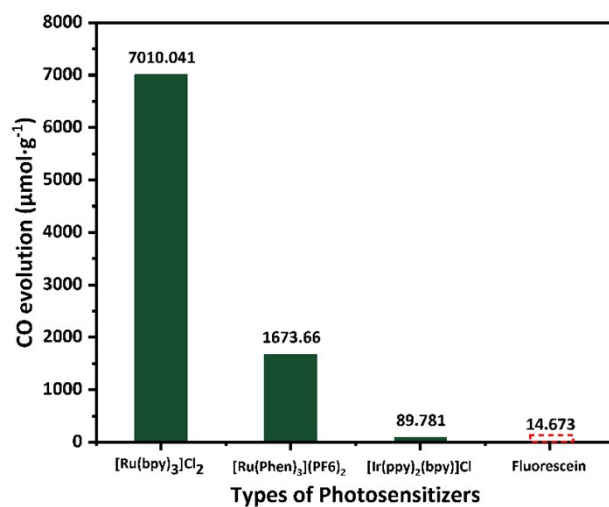

**Figure S14.** Amounts of CO detected using different types of photosensitizer.

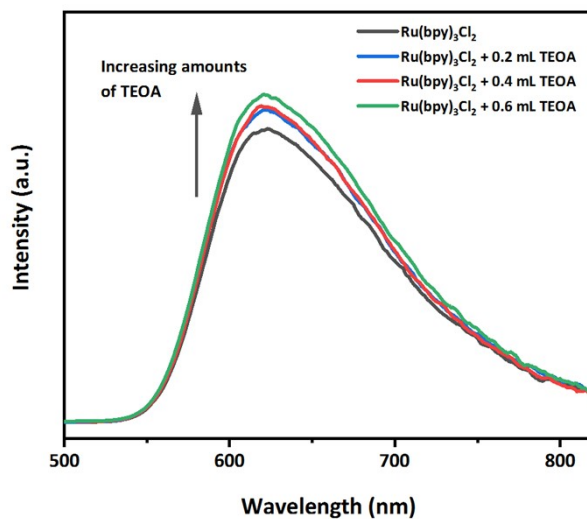

**Figure S15.** Steady state fluorescence spectra of [Ru(bpy)<sub>3</sub>]Cl<sub>2</sub> upon the addition of increasing amounts of TEOA. ( $\lambda_{\text{ex}} = 395 \text{ nm}$ )

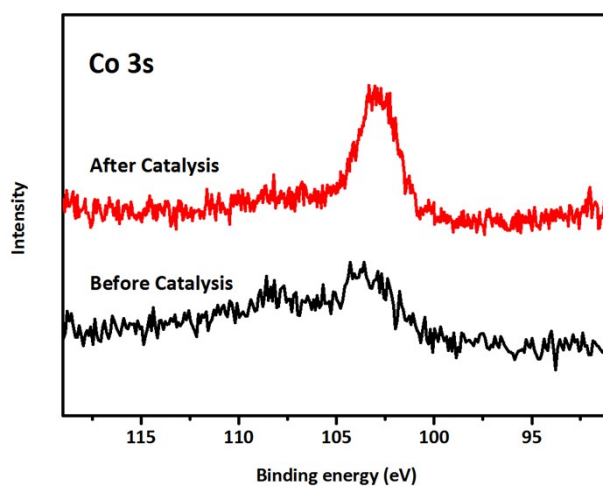

**Figure S16.** XPS spectrums of Co 3s orbit of Co-TBAPy before and after photocatalysis.

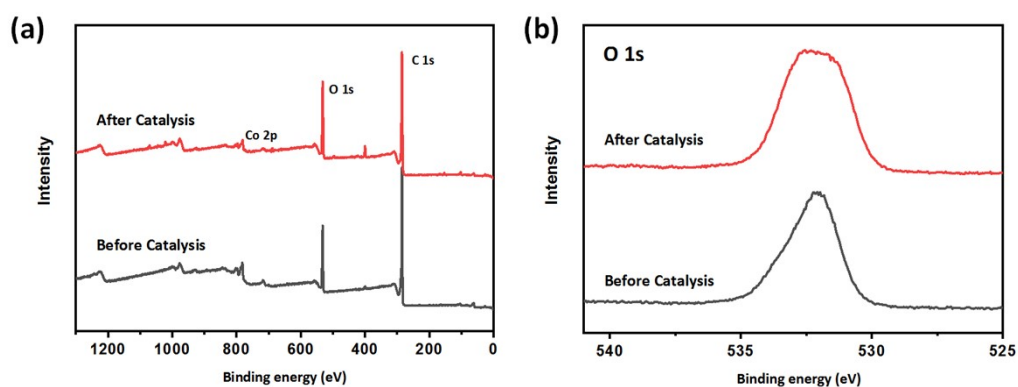

**Figure S17.** XPS spectrums of all elements (a) and O 1s orbit (b) of Co-TBAPy before and after photocatalysis.

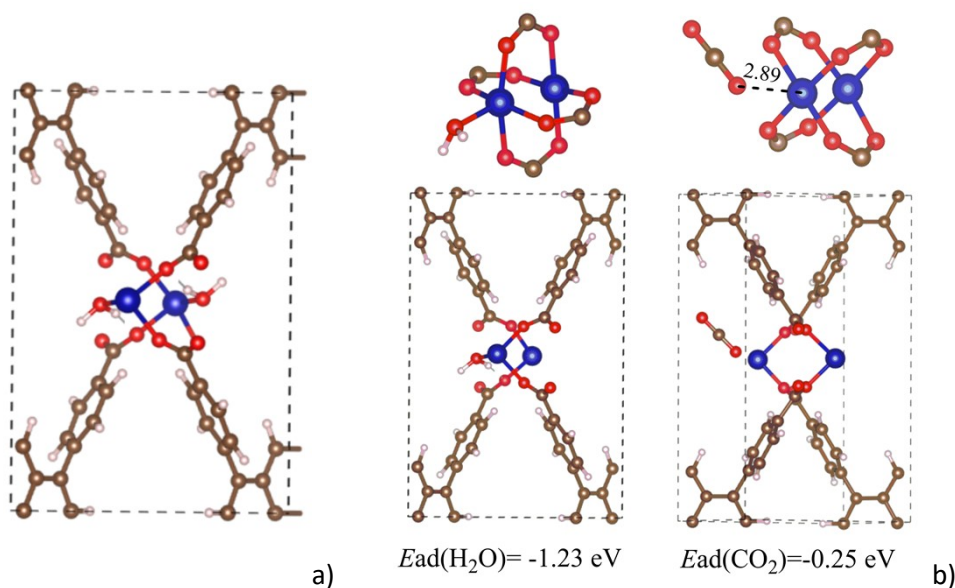

**Figure S18.** (a) The simulated configuration of Co-TBAPy. (b) The adsorption configuration of H<sub>2</sub>O or CO<sub>2</sub> on Co-TBAPy. Color representation: brown, C; red, O; blue, Co; white, H.

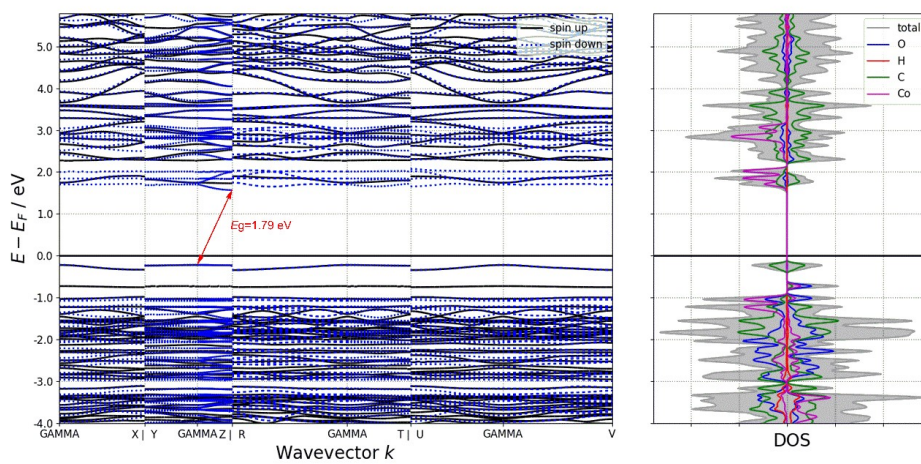

**Figure S19.** Band structure and density of states for Co-TBAPy.



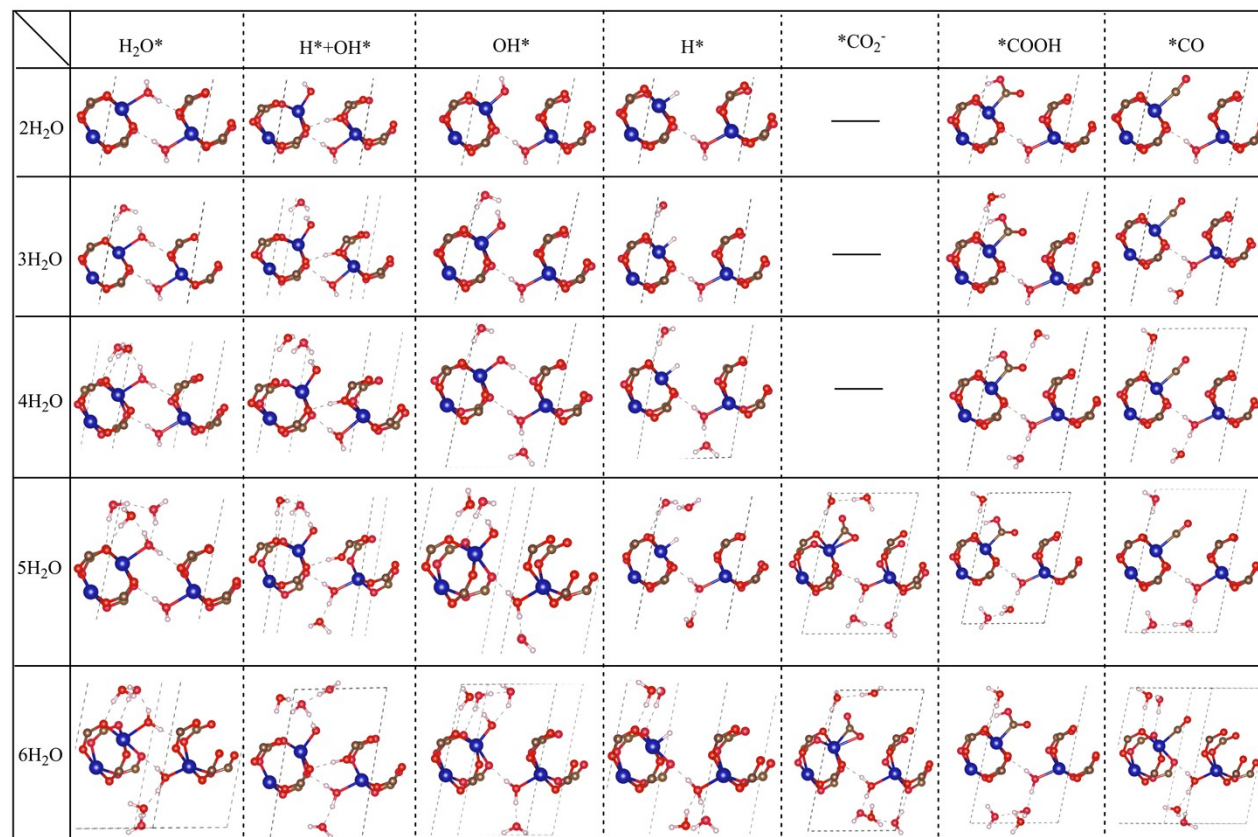

**Figure S20.** The intermediates along HER and  $\text{CO}_2\text{RR}$  pathways.

**Table S1.** Crystal data and structure refinement parameters for Co-TBAPy.

| Co-TBAPy                                                     |                                                                 |
|--------------------------------------------------------------|-----------------------------------------------------------------|
| Empirical formula                                            | C <sub>22</sub> CoO <sub>5</sub> H <sub>0.5</sub>               |
| Formula weight                                               | 403.65                                                          |
| Temperature/K                                                | 273.15                                                          |
| Crystal system                                               | triclinic                                                       |
| Space group                                                  | <i>P</i> -1                                                     |
| <i>a</i> /Å                                                  | 6.786(18)                                                       |
| <i>b</i> /Å                                                  | 10.87(2)                                                        |
| <i>c</i> /Å                                                  | 15.75(3)                                                        |
| $\alpha$ /°                                                  | 87.31(6)                                                        |
| $\beta$ /°                                                   | 87.77(11)                                                       |
| $\gamma$ /°                                                  | 77.39(10)                                                       |
| Volume/Å <sup>3</sup>                                        | 1132(4)                                                         |
| <i>Z</i>                                                     | 2                                                               |
| $\rho_{\text{calc}}$ (g/cm <sup>3</sup> )                    | 1.184                                                           |
| $\mu$ /mm <sup>-1</sup>                                      | 0.989                                                           |
| Reflections collected                                        | 1624                                                            |
| Independent reflections                                      | 1582                                                            |
| Goodness-of-fit on F <sup>2</sup>                            | 1.725                                                           |
| Final <i>R</i> indexes [ <i>I</i> > 2 $\sigma$ ( <i>I</i> )] | <i>R</i> <sub>1</sub> = 0.2009, <i>wR</i> <sub>2</sub> = 0.4172 |
| Final <i>R</i> indexes [all data]                            | <i>R</i> <sub>1</sub> = 0.3024, <i>wR</i> <sub>2</sub> = 0.4447 |

**Table S2.** The research of photocatalytic reaction conditions.<sup>a</sup>

| Entry          | CO [ $\mu$ mol]   | H <sub>2</sub> [ $\mu$ mol] | TON <sup>b</sup> |
|----------------|-------------------|-----------------------------|------------------|
| 1              | 37.13             | 52.06                       | 17.84            |
| 2 <sup>c</sup> | n.d. <sup>d</sup> | n.d.                        | n.d.             |
| 3 <sup>e</sup> | 1.10              | 5.06                        | 1.23             |
| 4 <sup>f</sup> | n.d.              | n.d.                        | n.d.             |
| 5 <sup>g</sup> | n.d.              | n.d.                        | n.d.             |
| 6 <sup>h</sup> | 0.02              | 2.24                        | 0.45             |
| 7 <sup>i</sup> | 1.72              | 32.84                       | 6.91             |

a. Reaction conditions: [Ru(bpy)<sub>3</sub>]Cl<sub>2</sub>·6H<sub>2</sub>O (0.01 mmol), Co-TBAPy (0.005 mmol, activated), acetonitrile (MeCN, 3.5 mL), H<sub>2</sub>O (0.5 mL), TEOA (1 mL), CO<sub>2</sub> (1 atm), LED Lamp,  $\lambda$  > 420 nm, 25 °C, 10 h. b. Turnover number (mol amount of CO and H<sub>2</sub>)/(mol amount of Co-TBAPy). c. Without Light. d. Not detectable. e. Without Co-TBAPy. f. Without [Ru(bpy)<sub>3</sub>]Cl<sub>2</sub>·6H<sub>2</sub>O. g. Without the TEOA. h. Replacing the CO<sub>2</sub> with N<sub>2</sub>. i. Low concentration of CO<sub>2</sub>. (5% CO<sub>2</sub>, 95% N<sub>2</sub>).

**Table S3.** Comparison of the photocatalytic CO<sub>2</sub> reduction performance of analogous MOF-based catalysts, homogeneous complexes and semiconductor materials.

| MOFs                                                                                                  | Conditions                  |               |             |              |                       |                  |                                         |           |
|-------------------------------------------------------------------------------------------------------|-----------------------------|---------------|-------------|--------------|-----------------------|------------------|-----------------------------------------|-----------|
|                                                                                                       | Quantity<br>[μmol]          | Light<br>[nm] | Time<br>[h] | CO<br>[μmol] | H <sub>2</sub> [μmol] | TON <sup>b</sup> | Syngas<br>ratio<br>(CO/H <sub>2</sub> ) | Reference |
| Co-TBAPy                                                                                              | 5                           | λ>420 nm      | 10          | 37.13        | 52.06                 | 17.84            | 0.14-1.65                               | This work |
| Co <sub>6</sub> -MOF                                                                                  | 5                           | λ>420 nm      | 3           | 39.36        | 28.13                 | 13.5             | —                                       | Ref. 1    |
| Co-MOF-74                                                                                             | 0.8                         | λ>420 nm      | 0.5         | 11.7         | 7.3                   | 23.8             | —                                       | Ref. 2    |
| Co-ZIF-9                                                                                              | 4                           | λ>420 nm      | 2           | 20.8         | 3.3                   | 6                | —                                       | Ref. 3    |
| (Co/Ru) <sub>2,4</sub> -UiO-67(bpydc)                                                                 | 1 mg                        | λ=450 nm, LED | 16          | 4.52         | 9.12                  | —                | 0.33-0.53                               | Ref. 4    |
| BIF-101                                                                                               | 24.6                        | λ>420 nm      | 10          | 583          | 110                   | 28.2             | 0.5-1                                   | Ref. 5    |
| [Co <sub>5</sub> (btz) <sub>6</sub> (NO <sub>3</sub> ) <sub>4</sub> (H <sub>2</sub> O) <sub>4</sub> ] | 0.08                        | λ>420 nm      | 70          | 79.2         | 140.6                 | 2748             | 0.06-0.5                                | Ref. 6    |
| CoAl-LDH/MoS <sub>2</sub>                                                                             | 0.2-1.5 mg·mL <sup>-1</sup> | λ>400 nm      | 1           | —            | —                     | —                | 0.07-0.77                               | Ref. 7    |

**Ref. 1:** J. Zhao, Q. Wang, C. Sun, T. Zheng, L. Yan, M. Li, K. Shao, X. Wang and Z. Su, *J. Mater. Chem. A*, 2017, **5**, 12498.

**Ref. 2:** S. B. Wang, W. S. Yao, J. L. Lin, Z. X. Ding and X. C. Wang, *Angew. Chem. Int. Ed.*, 2014, **53**, 1034.

**Ref. 3:** S. B. Wang, J. L. Lin and X. C. Wang, *Phys. Chem. Chem. Phys.*, 2014, **16**, 14656.

**Ref. 4:** M. Liu, Y. F. Mu, S. Yao, S. Guo, X. W. Guo, Z. M. Zhang, T. B. Lu, *Appl. Catal. B: Environ.*, 2019, **245**, 496.

**Ref. 5:** Q. L. Hong, H. X. Zhang and J. Zhang, *J. Mater. Chem. A*, 2019, **7**, 17272.

**Ref. 6:** M. Sun, C. Wang, C. Y. Sun, M. Zhang, Z. M. Su. *J. Catal.*, 2020, **385**, 70.

**Ref. 7:** C. H. Qiu, X. J. Hao, L. Tan, X. Wang, W. J. Cao, J. Y. Liu, Y. F. Zhao and Y. F. Song. *Chem. Commun.*, 2020, **56**, 5354.
